# Supplementary material for: Murine- and Human-Derived Autologous Organoid/Immune Cell Co-Cultures as Pre-Clinical Models of Pancreatic Ductal Adenocarcinoma
Source: Cancers (Basel). 2020 Dec 17;12(12):3816. doi: 10.3390/cancers12123816 (PMC7766822; doi:10.3390/cancers12123816)
Supplement: Supplementary file 1 [file cancers-12-03816-s001.pdf]

# Supplementary Materials: Murine and Human-Derived Autologous Organoid/Immune Cell Co-Cultures as Preclinical Models of Pancreatic Ductal Adenocarcinoma

Loryn Holokai, Jayati Chakrabarti, Joanne Lundy, Daniel Croagh, Pritha Adhikary, Scott S. Richards, Chantal Woodson, Nina Steele, Robert Kuester, Aaron Scott, Mohammad Khreiss, Timothy Frankel, Juanita Merchant, Brendan J. Jenkins, Jiang Wang, Rachna T. Shroff, Syed A. Ahmad and Yana Zavros

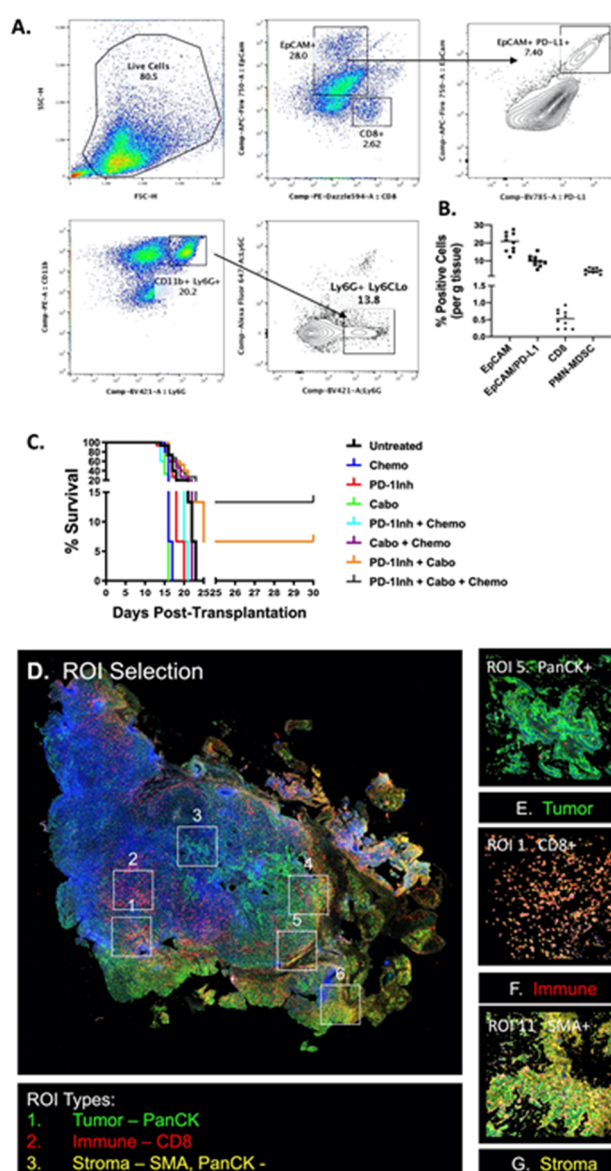

**Figure S1.** (A) Flow cytometric gating strategy for the quantification of EpCAM+/PD-L1+, CD8+, and CD11b+Ly6G+Ly6G- cell populations. (B) Quantification of major cell populations in gram per total tumor tissue. (C) Kaplan-Meier curve of survival in response to experimental treatment groups,  $n = 20$  mice per group. Digital Spatial Profiling (DSP) demonstrating the (D) ROIs selection, and isolated (E) tumor, (F) immune, and (G) stroma compartment.

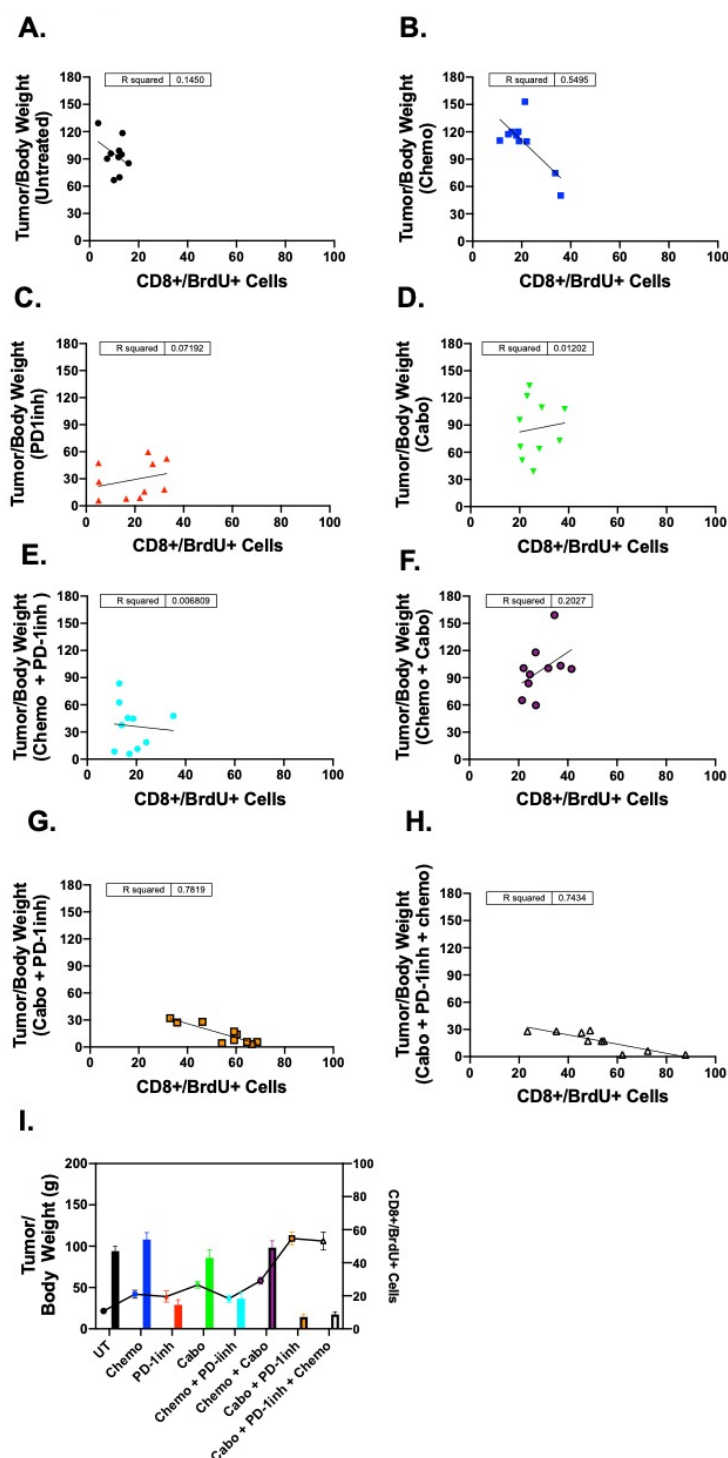

**Figure S2.** Regression analysis between tumor/body weight and CD8+/BrdU+ cells in different experimental groups: (A) untreated or treated with (B) Chemo (C) PD-1inh, (D) Cabo, (E) Chemo + PD-1inh, (F) Chemo + Cabo (G) Cabo + PD-1inh and (H) Cabo + PD-1inh + Chemo. (I). Column-line graph showing the summarized correlation between tumor weight and CTL proliferation in each experimental group.  $n = 10$  mice per group.

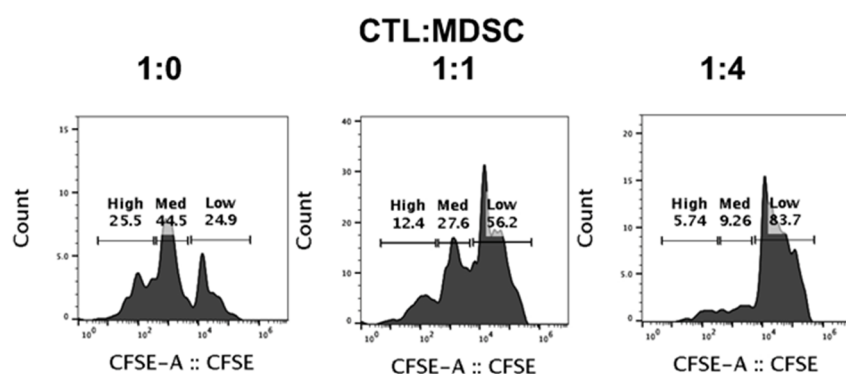

**Figure S3.** CFSE T cell proliferation assay in response to increased ratio of CTL: MDSCs.

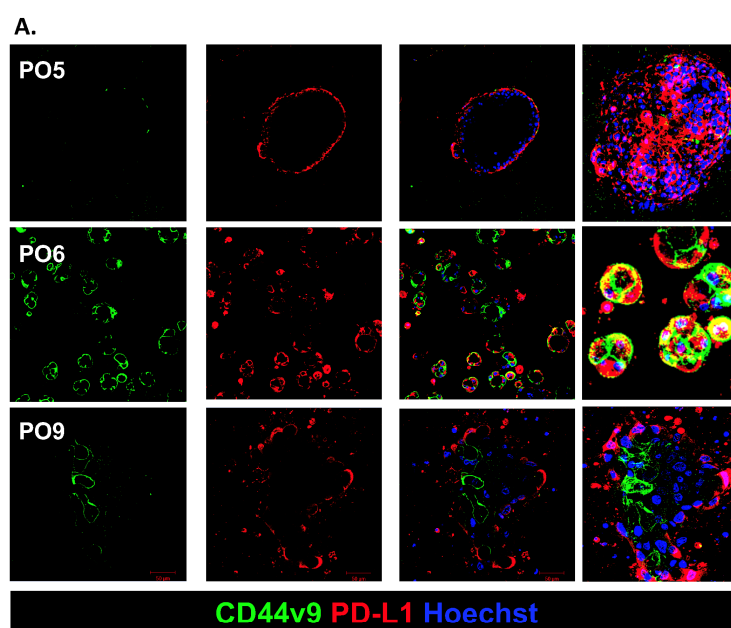

**B.**

| Patient | Patient Chemotherapy Treatment | Stage |
|---------|--------------------------------|-------|
| PO5     | FOLFIRINOX (adjuvant)          | pT3N1 |
| PO6     | FOLFIRINOX (adjuvant)          | pT1N0 |
| PO9     | No treatment                   | pT3N1 |
| PO10    | Gemcitabine Abraxane           | pT2N0 |
| PO17    | FOLFIRINOX (adjuvant)          | pT1N0 |
| PO24    | FOLFIRINOX                     | pT3N1 |
| PO26    | FOLFIRINOX                     | pT2N2 |
| PO28    | Gemcitabine Abraxane           | pT2N2 |
| PO29    | FOLFIRINOX (adjuvant)          | pT2N1 |
| PO30    | FOLFIRINOX (adjuvant)          | pT2N2 |

**Figure S4.** PD-L1 expression in organoids used for co-culture and patient information. **(A)** Immunofluorescence staining of patient-derived organoids for the expression of PD-L1 (red) and CD44v9 (green). **(B)** Table of patient tumor staging, tumor cell differentiation and invasion of adjacent tissue and lymph nodes.

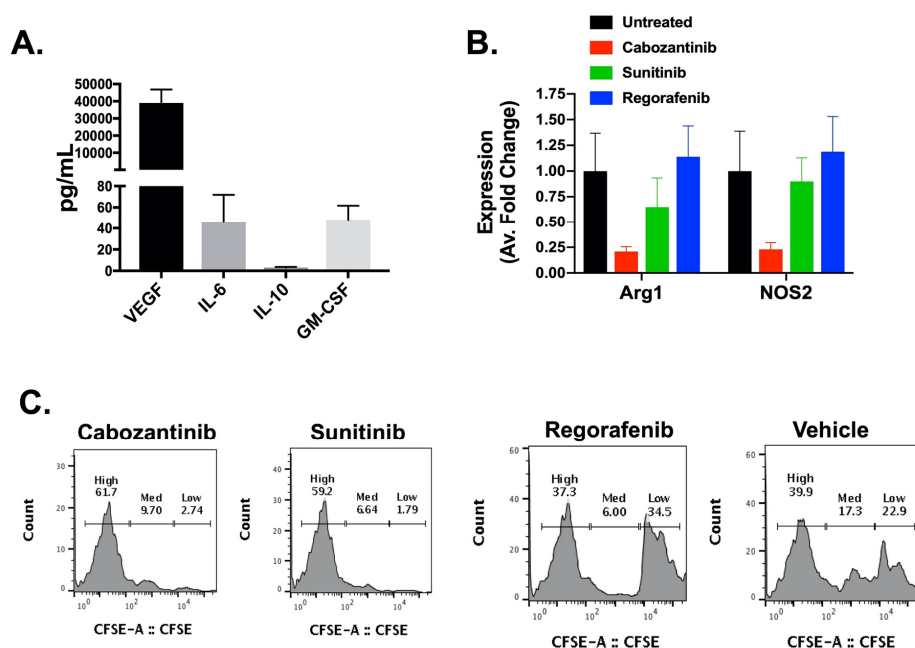

**Figure S5.** Immunosuppressive PMN-MDSC functional analysis. **(A)** Luminex assay of organoid conditioned media for the measurement of VEGF, IL-6, IL-10 and GM-CSF. Patient-derived MDSC were differentiated to PMN-MDSCs using cancer organoid conditioned media and co-cultured with CTLs. **(B)** Quantitative RT-PCR using RNA extracted from MDSC/CTL co-cultures treated with cabozantinib, sunitinib and regorafenib measuring Arg1 and NOS2 expression. **(C)** Changes in CTL proliferation as measured by CFSE T cell proliferation assay in MDSC/CTL co-cultures treated with cabozantinib, sunitinib and regorafenib was used to measure Arg1 and NOS2 expression. \* $P < 0.05$  compared to untreated group,  $n = 4$  individual patient-derived PMN-MDSC/CTL co-cultures.

**Publisher's Note:** MDPI stays neutral with regard to jurisdictional claims in published maps and institutional affiliations.

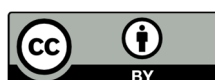

© 2020 by the authors. Licensee MDPI, Basel, Switzerland. This article is an open access article distributed under the terms and conditions of the Creative Commons Attribution (CC BY) license (<http://creativecommons.org/licenses/by/4.0/>).
